# Supplementary material for: Isolation and characterization of Stenotrophomonas rhizophila T3E: a multifunctional rhizobacterium enhancing tomato growth and soil health
Source: Frontiers journal article supplement (doi:10.3389/fpls.2025.1692957), 2025-10-23
Supplement: Data_Sheet_2.xls [file Data_Sheet_2.xls]

## Sheet: 碳水化合物活性酶分析详情表_AnnoCAZy_Origin
Supplementary Table S2. Diversity of CAZymes in T3E strains.
Gene ID	Location	Family	Family Description	Class	Class Description	Coverage(%)	Evalue
gene0007	Chromosome	GT41	UDP-Glc: peptide N-β-glucosyltransferase (EC 2.4.1.-);GDP-L-Fuc: protein O-α-L-fucosyltransferase (EC 2.4.1.221);UDP-GlcNAc: protein O-β-N-acetylglucosaminyltransferase (EC 2.4.1.255);	GT	Glycosyl Transferases	46	1.3e-06
gene0020	Chromosome	GT51	Peptidoglycan glycosyltransferase (EC 2.4.1.129);	GT	Glycosyl Transferases	45	1.3e-08
gene0566	Chromosome	GT2_Glycos_transf_2	GT2's subfamily	GT	Glycosyl Transferases	39	7e-21
gene0584	Chromosome	GT2_Glycos_transf_2	GT2's subfamily	GT	Glycosyl Transferases	40	3.2e-13
gene0627	Chromosome	GT2_Glycos_transf_2	GT2's subfamily	GT	Glycosyl Transferases	41	6.9e-07
gene0628	Chromosome	GT2_Glycos_transf_2	GT2's subfamily	GT	Glycosyl Transferases	50	3.4e-23
gene0659	Chromosome	GT28	UDP-Glc: 1,2-diacylglycerol 3-glucosyltransferase (EC 2.4.1.157);UDP-GlcNAc: undecaprenyldiphospho-muramoylpentapeptide β-1,4-N-acetylglucosaminyltransferase (EC 2.4.1.227);Digalactosyldiacylglycerol synthase (EC 2.4.1.241);Monogalactosyldiacylglycerol synthase (EC 2.4.1.46);	GT	Glycosyl Transferases	45	1.8e-51
gene0759	Chromosome	GT41	UDP-Glc: peptide N-β-glucosyltransferase (EC 2.4.1.-);GDP-L-Fuc: protein O-α-L-fucosyltransferase (EC 2.4.1.221);UDP-GlcNAc: protein O-β-N-acetylglucosaminyltransferase (EC 2.4.1.255);	GT	Glycosyl Transferases	98	7.1e-121
gene0762	Chromosome	GT41	UDP-Glc: peptide N-β-glucosyltransferase (EC 2.4.1.-);GDP-L-Fuc: protein O-α-L-fucosyltransferase (EC 2.4.1.221);UDP-GlcNAc: protein O-β-N-acetylglucosaminyltransferase (EC 2.4.1.255);	GT	Glycosyl Transferases	36	2.4e-14
gene0850	Chromosome	GT4	1L-myo-inositol-1-P α-N-acetylglucoaminyltransferase (EC 2.4.1.-);EPS α-1,6-galactosyltransferase (EC 2.4.1.-);GDP-Man : α-1,4-mannosyltransferase (EC 2.4.1.-);GDP-Man α-mannosyltransferase (EC 2.4.1.-);GDP-Man: α-1,3-mannosyltransferase (EC 2.4.1.-);GDP-Man:queuosine α-mannosyltransferase (EC 2.4.1.-);GDP-Rha: α-1,3-rhamnosyltransferase (EC 2.4.1.-);Hexosyltransferases (EC 2.4.1.-);LPS α-1,6-gal…	GT	Glycosyl Transferases	38	2.8e-31
gene0885	Chromosome	GT9	LPS β-N-acetylglucosaminyltransferase (EC 2.4.1.56);LOS α-1,6-heptosyltransferase (EC 2.4.99.-);LPS α-1,6-heptosyltransferase (EC 2.4.99.-);Heptosyltransferase (EC 2.4.99.-);	GT	Glycosyl Transferases	65	1.6e-46
gene0899	Chromosome	GT83	Undecaprenyl phosphate-α-L-Ara4N: 4-amino-4-deoxy-β-L-arabinosyltransferase (EC 2.4.2.43);	GT	Glycosyl Transferases	58	3.5e-26
gene1263	Chromosome	GT19	Lipid-A-disaccharide synthase (EC 2.4.1.182);	GT	Glycosyl Transferases	91	6.7e-131
gene1669	Chromosome	GT41	UDP-Glc: peptide N-β-glucosyltransferase (EC 2.4.1.-);GDP-L-Fuc: protein O-α-L-fucosyltransferase (EC 2.4.1.221);UDP-GlcNAc: protein O-β-N-acetylglucosaminyltransferase (EC 2.4.1.255);	GT	Glycosyl Transferases	31	1.1e-08
gene1678	Chromosome	GT41	UDP-Glc: peptide N-β-glucosyltransferase (EC 2.4.1.-);GDP-L-Fuc: protein O-α-L-fucosyltransferase (EC 2.4.1.221);UDP-GlcNAc: protein O-β-N-acetylglucosaminyltransferase (EC 2.4.1.255);	GT	Glycosyl Transferases	37	2.6e-12
gene2038	Chromosome	GT41	UDP-Glc: peptide N-β-glucosyltransferase (EC 2.4.1.-);GDP-L-Fuc: protein O-α-L-fucosyltransferase (EC 2.4.1.221);UDP-GlcNAc: protein O-β-N-acetylglucosaminyltransferase (EC 2.4.1.255);	GT	Glycosyl Transferases	44	1.1e-06
gene2467	Chromosome	GT41	UDP-Glc: peptide N-β-glucosyltransferase (EC 2.4.1.-);GDP-L-Fuc: protein O-α-L-fucosyltransferase (EC 2.4.1.221);UDP-GlcNAc: protein O-β-N-acetylglucosaminyltransferase (EC 2.4.1.255);	GT	Glycosyl Transferases	36	2.9e-08
gene2483	Chromosome	GT2_Glyco_tranf_2_3	GT2's subfamily	GT	Glycosyl Transferases	53	2.6e-34
gene2613	Chromosome	GT4	1L-myo-inositol-1-P α-N-acetylglucoaminyltransferase (EC 2.4.1.-);EPS α-1,6-galactosyltransferase (EC 2.4.1.-);GDP-Man : α-1,4-mannosyltransferase (EC 2.4.1.-);GDP-Man α-mannosyltransferase (EC 2.4.1.-);GDP-Man: α-1,3-mannosyltransferase (EC 2.4.1.-);GDP-Man:queuosine α-mannosyltransferase (EC 2.4.1.-);GDP-Rha: α-1,3-rhamnosyltransferase (EC 2.4.1.-);Hexosyltransferases (EC 2.4.1.-);LPS α-1,6-gal…	GT	Glycosyl Transferases	40	2.9e-32
gene2722	Chromosome	GT41	UDP-Glc: peptide N-β-glucosyltransferase (EC 2.4.1.-);GDP-L-Fuc: protein O-α-L-fucosyltransferase (EC 2.4.1.221);UDP-GlcNAc: protein O-β-N-acetylglucosaminyltransferase (EC 2.4.1.255);	GT	Glycosyl Transferases	34	5.1e-17
gene2778	Chromosome	GT83	Undecaprenyl phosphate-α-L-Ara4N: 4-amino-4-deoxy-β-L-arabinosyltransferase (EC 2.4.2.43);	GT	Glycosyl Transferases	91	1e-86
gene2837	Chromosome	GT2_Glycos_transf_2	GT2's subfamily	GT	Glycosyl Transferases	48	1.2e-28
gene2838	Chromosome	GT51	Peptidoglycan glycosyltransferase (EC 2.4.1.129);	GT	Glycosyl Transferases	65	2.8e-51
gene2874	Chromosome	GT2_Glyco_tranf_2_3	GT2's subfamily	GT	Glycosyl Transferases	31	3.2e-18
gene2913	Chromosome	GT20	[retaining] GDP-valeniol: validamine 7-phosphate valeniolyltransferase (EC 2.-.-.-);α,α-trehalose-6-phosphate synthase (UDP-forming) (EC 2.4.1.15);Glucosylglycerol-phosphate synthase (EC 2.4.1.213);α,α-trehalose-6-phosphate synthase (GDP-forming) (EC 2.4.1.36);Trehalose-6-P phosphatase (EC 3.1.3.12);	GT	Glycosyl Transferases	64	3e-152
gene2937	Chromosome	GT20	[retaining] GDP-valeniol: validamine 7-phosphate valeniolyltransferase (EC 2.-.-.-);α,α-trehalose-6-phosphate synthase (UDP-forming) (EC 2.4.1.15);Glucosylglycerol-phosphate synthase (EC 2.4.1.213);α,α-trehalose-6-phosphate synthase (GDP-forming) (EC 2.4.1.36);Trehalose-6-P phosphatase (EC 3.1.3.12);	GT	Glycosyl Transferases	96	3.9e-162
gene3100	Chromosome	GT30	[inverting] CMP-β-KDO: α-3-deoxy-D-manno-octulosonic-acid (KDO) transferase (EC 2.4.3.-);	GT	Glycosyl Transferases	40	2.9e-73
gene3103	Chromosome	GT4	1L-myo-inositol-1-P α-N-acetylglucoaminyltransferase (EC 2.4.1.-);EPS α-1,6-galactosyltransferase (EC 2.4.1.-);GDP-Man : α-1,4-mannosyltransferase (EC 2.4.1.-);GDP-Man α-mannosyltransferase (EC 2.4.1.-);GDP-Man: α-1,3-mannosyltransferase (EC 2.4.1.-);GDP-Man:queuosine α-mannosyltransferase (EC 2.4.1.-);GDP-Rha: α-1,3-rhamnosyltransferase (EC 2.4.1.-);Hexosyltransferases (EC 2.4.1.-);LPS α-1,6-gal…	GT	Glycosyl Transferases	40	3e-17
gene3306	Chromosome	GT2_Glyco_trans_2_3	GT2's subfamily	GT	Glycosyl Transferases	31	1.8e-15
gene3318	Chromosome	GT2_Glyco_tranf_2_3	GT2's subfamily	GT	Glycosyl Transferases	94	9.5e-12
gene3369	Chromosome	GT2_Glycos_transf_2	GT2's subfamily	GT	Glycosyl Transferases	41	2.5e-16
gene3370	Chromosome	GT4	1L-myo-inositol-1-P α-N-acetylglucoaminyltransferase (EC 2.4.1.-);EPS α-1,6-galactosyltransferase (EC 2.4.1.-);GDP-Man : α-1,4-mannosyltransferase (EC 2.4.1.-);GDP-Man α-mannosyltransferase (EC 2.4.1.-);GDP-Man: α-1,3-mannosyltransferase (EC 2.4.1.-);GDP-Man:queuosine α-mannosyltransferase (EC 2.4.1.-);GDP-Rha: α-1,3-rhamnosyltransferase (EC 2.4.1.-);Hexosyltransferases (EC 2.4.1.-);LPS α-1,6-gal…	GT	Glycosyl Transferases	39	1.7e-21
gene3372	Chromosome	GT83	Undecaprenyl phosphate-α-L-Ara4N: 4-amino-4-deoxy-β-L-arabinosyltransferase (EC 2.4.2.43);	GT	Glycosyl Transferases	93	5.1e-108
gene3679	Chromosome	GT2_Glycos_transf_2	GT2's subfamily	GT	Glycosyl Transferases	50	3.4e-21
gene3712	Chromosome	GT1	C-glycosyltransferase (EC 2.4.-.-);Hexosyltransferases (EC 2.4.1.-);TDP-D-desosamine: macrolide D-desosaminyltransferase (EC 2.4.1.-);UDP-Arap: flavone-C-arabinosytransferase (EC 2.4.1.-);UDP-Glc: 6-hydroxyflavone β-glucosyltransferase (EC 2.4.1.-);UDP-Glc: 7-deoxyloganetic acid β-glucosyltransferase (EC 2.4.1.-);UDP-Glc: 7-deoxyloganetin β-glucosyltransferase (EC 2.4.1.-);UDP-Glc: anthocyanin 5-…	GT	Glycosyl Transferases	95	7.4e-41
gene3721	Chromosome	GT2_Glycos_transf_2	GT2's subfamily	GT	Glycosyl Transferases	68	2.5e-28
gene0027	Chromosome	CE4	Chitin oligosaccharide deacetylase (EC 3.1.1.-);Acetylesterase (EC 3.1.1.6);Acetylxylan esterase (EC 3.1.1.72);LPS deacetylase (EC 3.5.1.-);Poly-β-1,6-N-acetylglucosamine deacetylase (EC 3.5.1.-);Peptidoglycan N-acetylglucosamine deacetylase (EC 3.5.1.104);Chitin deacetylase (EC 3.5.1.41);	CE	Carbohydrate Esterases	47	1.2e-19
gene0062	Chromosome	CE12	Carboxylic ester hydrolase (EC 3.1.1.-);Pectin acetylesterase (EC 3.1.1.-);Acetylxylan esterase (EC 3.1.1.72);Rhamnogalacturonan acetylesterase (EC 3.1.1.86);	CE	Carbohydrate Esterases	55	7.4e-68
gene0342	Chromosome	CE3	Acetylesterase (EC 3.1.1.6);Acetylxylan esterase (EC 3.1.1.72);	CE	Carbohydrate Esterases	50	3.9e-07
gene0546	Chromosome	CE1	Trehalose 6-O-mycolyltransferase (EC 2.3.1.122);Diacylglycerol O-acyltransferase (EC 2.3.1.20);Carboxylic ester hydrolase (EC 3.1.1.-);Acetylxylan esterase (EC 3.1.1.72);Feruloyl esterase (EC 3.1.1.73);	CE	Carbohydrate Esterases	33	8.6e-07
gene0665	Chromosome	CE11	UDP-3-O-acyl N-acetylglucosamine deacetylase (EC 3.5.1.108);	CE	Carbohydrate Esterases	90	1.5e-113
gene0698	Chromosome	CE3	Acetylesterase (EC 3.1.1.6);Acetylxylan esterase (EC 3.1.1.72);	CE	Carbohydrate Esterases	57	6.5e-09
gene0701	Chromosome	CE3	Acetylesterase (EC 3.1.1.6);Acetylxylan esterase (EC 3.1.1.72);	CE	Carbohydrate Esterases	67	3.6e-09
gene0931	Chromosome	CE1	Trehalose 6-O-mycolyltransferase (EC 2.3.1.122);Diacylglycerol O-acyltransferase (EC 2.3.1.20);Carboxylic ester hydrolase (EC 3.1.1.-);Acetylxylan esterase (EC 3.1.1.72);Feruloyl esterase (EC 3.1.1.73);	CE	Carbohydrate Esterases	93	1.8e-07
gene0980	Chromosome	CE1	Trehalose 6-O-mycolyltransferase (EC 2.3.1.122);Diacylglycerol O-acyltransferase (EC 2.3.1.20);Carboxylic ester hydrolase (EC 3.1.1.-);Acetylxylan esterase (EC 3.1.1.72);Feruloyl esterase (EC 3.1.1.73);	CE	Carbohydrate Esterases	77	1.7e-32
gene1116	Chromosome	CE1	Trehalose 6-O-mycolyltransferase (EC 2.3.1.122);Diacylglycerol O-acyltransferase (EC 2.3.1.20);Carboxylic ester hydrolase (EC 3.1.1.-);Acetylxylan esterase (EC 3.1.1.72);Feruloyl esterase (EC 3.1.1.73);	CE	Carbohydrate Esterases	33	1.2e-17
gene1117	Chromosome	CE1	Trehalose 6-O-mycolyltransferase (EC 2.3.1.122);Diacylglycerol O-acyltransferase (EC 2.3.1.20);Carboxylic ester hydrolase (EC 3.1.1.-);Acetylxylan esterase (EC 3.1.1.72);Feruloyl esterase (EC 3.1.1.73);	CE	Carbohydrate Esterases	34	9.6e-16
gene1122	Chromosome	CE1	Trehalose 6-O-mycolyltransferase (EC 2.3.1.122);Diacylglycerol O-acyltransferase (EC 2.3.1.20);Carboxylic ester hydrolase (EC 3.1.1.-);Acetylxylan esterase (EC 3.1.1.72);Feruloyl esterase (EC 3.1.1.73);	CE	Carbohydrate Esterases	32	1.8e-10
gene1619	Chromosome	CE3	Acetylesterase (EC 3.1.1.6);Acetylxylan esterase (EC 3.1.1.72);	CE	Carbohydrate Esterases	49	2.2e-06
gene1899	Chromosome	CE1	Trehalose 6-O-mycolyltransferase (EC 2.3.1.122);Diacylglycerol O-acyltransferase (EC 2.3.1.20);Carboxylic ester hydrolase (EC 3.1.1.-);Acetylxylan esterase (EC 3.1.1.72);Feruloyl esterase (EC 3.1.1.73);	CE	Carbohydrate Esterases	72	1.7e-16
gene1940	Chromosome	CE7	Carboxylic ester hydrolase (EC 3.1.1.-);Cephalosporin-C deacetylase (EC 3.1.1.41);Acetylxylan esterase (EC 3.1.1.72);	CE	Carbohydrate Esterases	41	3.4e-06
gene1943	Chromosome	CE1	Trehalose 6-O-mycolyltransferase (EC 2.3.1.122);Diacylglycerol O-acyltransferase (EC 2.3.1.20);Carboxylic ester hydrolase (EC 3.1.1.-);Acetylxylan esterase (EC 3.1.1.72);Feruloyl esterase (EC 3.1.1.73);	CE	Carbohydrate Esterases	64	1.6e-28
gene1996	Chromosome	CE19	Pectin methylesterase (EC 3.1.1.11);	CE	Carbohydrate Esterases	38	3.6e-11
gene2034	Chromosome	CE1	Trehalose 6-O-mycolyltransferase (EC 2.3.1.122);Diacylglycerol O-acyltransferase (EC 2.3.1.20);Carboxylic ester hydrolase (EC 3.1.1.-);Acetylxylan esterase (EC 3.1.1.72);Feruloyl esterase (EC 3.1.1.73);	CE	Carbohydrate Esterases	69	4.1e-21
gene2332	Chromosome	CE1	Trehalose 6-O-mycolyltransferase (EC 2.3.1.122);Diacylglycerol O-acyltransferase (EC 2.3.1.20);Carboxylic ester hydrolase (EC 3.1.1.-);Acetylxylan esterase (EC 3.1.1.72);Feruloyl esterase (EC 3.1.1.73);	CE	Carbohydrate Esterases	55	6.3e-08
gene2334	Chromosome	CE3	Acetylesterase (EC 3.1.1.6);Acetylxylan esterase (EC 3.1.1.72);	CE	Carbohydrate Esterases	56	9.2e-18
gene2531	Chromosome	CE1	Trehalose 6-O-mycolyltransferase (EC 2.3.1.122);Diacylglycerol O-acyltransferase (EC 2.3.1.20);Carboxylic ester hydrolase (EC 3.1.1.-);Acetylxylan esterase (EC 3.1.1.72);Feruloyl esterase (EC 3.1.1.73);	CE	Carbohydrate Esterases	32	8.4e-09
gene2614	Chromosome	CE4	Chitin oligosaccharide deacetylase (EC 3.1.1.-);Acetylesterase (EC 3.1.1.6);Acetylxylan esterase (EC 3.1.1.72);LPS deacetylase (EC 3.5.1.-);Poly-β-1,6-N-acetylglucosamine deacetylase (EC 3.5.1.-);Peptidoglycan N-acetylglucosamine deacetylase (EC 3.5.1.104);Chitin deacetylase (EC 3.5.1.41);	CE	Carbohydrate Esterases	60	1.2e-34
gene2828	Chromosome	CE1	Trehalose 6-O-mycolyltransferase (EC 2.3.1.122);Diacylglycerol O-acyltransferase (EC 2.3.1.20);Carboxylic ester hydrolase (EC 3.1.1.-);Acetylxylan esterase (EC 3.1.1.72);Feruloyl esterase (EC 3.1.1.73);	CE	Carbohydrate Esterases	38	1.7e-09
gene2965	Chromosome	CE16	Acetylesterase (EC 3.1.1.6);	CE	Carbohydrate Esterases	41	7.7e-20
gene3127	Chromosome	CE3	Acetylesterase (EC 3.1.1.6);Acetylxylan esterase (EC 3.1.1.72);	CE	Carbohydrate Esterases	87	1.3e-11
gene3130	Chromosome	CE4	Chitin oligosaccharide deacetylase (EC 3.1.1.-);Acetylesterase (EC 3.1.1.6);Acetylxylan esterase (EC 3.1.1.72);LPS deacetylase (EC 3.5.1.-);Poly-β-1,6-N-acetylglucosamine deacetylase (EC 3.5.1.-);Peptidoglycan N-acetylglucosamine deacetylase (EC 3.5.1.104);Chitin deacetylase (EC 3.5.1.41);	CE	Carbohydrate Esterases	43	3.7e-29
gene3142	Chromosome	CE1	Trehalose 6-O-mycolyltransferase (EC 2.3.1.122);Diacylglycerol O-acyltransferase (EC 2.3.1.20);Carboxylic ester hydrolase (EC 3.1.1.-);Acetylxylan esterase (EC 3.1.1.72);Feruloyl esterase (EC 3.1.1.73);	CE	Carbohydrate Esterases	91	4.3e-55
gene3193	Chromosome	CE9	N-acetylglucosamine-6-phosphate deacetylase (EC 3.5.1.25);	CE	Carbohydrate Esterases	97	2.1e-130
gene3305	Chromosome	CE1	Trehalose 6-O-mycolyltransferase (EC 2.3.1.122);Diacylglycerol O-acyltransferase (EC 2.3.1.20);Carboxylic ester hydrolase (EC 3.1.1.-);Acetylxylan esterase (EC 3.1.1.72);Feruloyl esterase (EC 3.1.1.73);	CE	Carbohydrate Esterases	83	1.2e-08
gene3320	Chromosome	CE14	Diacetylchitobiose deacetylase (EC 3.5.1.-);Chitin disaccharide deacetylase (RE) (EC 3.5.1.105);Mycothiol S-conjugate amidase (EC 3.5.1.115);Chitin disaccharide deacetylase (NRE) (EC 3.5.1.136);N-acetylglucosamine deacetylase (EC 3.5.1.33);N-acetylglucosaminylphosphatidylinositol deacetylase (EC 3.5.1.89);	CE	Carbohydrate Esterases	35	2.7e-19
gene3595	Chromosome	CE9	N-acetylglucosamine-6-phosphate deacetylase (EC 3.5.1.25);	CE	Carbohydrate Esterases	96	1.4e-111
gene0058	Chromosome	GH43_9	GH43's subfamily	GH	Glycoside Hydrolases	51	3.3e-134
gene0148	Chromosome	GH102	Peptidoglycan lytic transglycosylase / peptidoglycan lyase (EC 4.2.2.-);	GH	Glycoside Hydrolases	39	2.8e-58
gene0419	Chromosome	GH3	[retaining] β-NAcetylglucosaminoside phosphorylase (EC 2.4.1.-);β-glycan phosphorylase (EC 2.4.1.-);MLG exo-β-1,4-glucosidase (EC 3.2.1.-);[retaining] xyloglucan-specific exo-β-1,4-glucosidase (EC 3.2.1.-);α-L-arabinopyranosidase (EC 3.2.1.-);Avenacinase (EC 3.2.1.-);β-1,2-glucosidase (EC 3.2.1.-);β-1,6-glucosidase (EC 3.2.1.-);D-4,5-unsaturated β-glucuronyl hydrolase (EC 3.2.1.-);Exo-β-1,3-1,4-g…	GH	Glycoside Hydrolases	31	3.8e-65
gene0488	Chromosome	GH23	Chitinase (EC 3.2.1.14);Lysozyme (EC 3.2.1.17);Peptidoglycan lytic transglycosylase / peptidoglycan lyase (EC 4.2.2.-);	GH	Glycoside Hydrolases	42	5.1e-30
gene0580	Chromosome	GH99	Glycoprotein endo-α-1,2-mannosidase (EC 3.2.1.130);Mannan endo-1,2-α-mannanase (EC 3.2.1.198);	GH	Glycoside Hydrolases	48	1.9e-11
gene0612	Chromosome	GH18	Nod factor hydrolase (EC 3.2.1.-);Chitin exo-β-1,4-N-acetylglucosaminidase (EC 3.2.1.-);Di-N-acetylchitobiase / reducing-end exo-hexosaminidase (EC 3.2.1.-);Peptidoglycan endo-β-1,4-N-acetylglucosaminidase (EC 3.2.1.-);Chitosanase (EC 3.2.1.132);Chitinase (EC 3.2.1.14);Chitin exo-β-1,4-N-acetylglucobiosaminidase (EC 3.2.1.200);[reducing end] exo-chitinase (EC 3.2.1.201);β-N-acetylhexosaminidase (…	GH	Glycoside Hydrolases	57	7.4e-84
gene0877	Chromosome	GH23	Chitinase (EC 3.2.1.14);Lysozyme (EC 3.2.1.17);Peptidoglycan lytic transglycosylase / peptidoglycan lyase (EC 4.2.2.-);	GH	Glycoside Hydrolases	35	3.3e-23
gene1054	Chromosome	GH13_23	GH13's subfamily	GH	Glycoside Hydrolases	65	2.9e-157
gene1056	Chromosome	GH97	α-glucosidase (EC 3.2.1.20);α-galactosidase (EC 3.2.1.22);[inverting] glucoamylase (EC 3.2.1.3);[retaining] β-L-arabinopyranosidase / β-L-arabinosidase (EC 3.2.1.88);	GH	Glycoside Hydrolases	96	1.7e-239
gene1057	Chromosome	GH78	Isoflavone 7-O-glucosyl α-1,6-rhamnosidase (EC 3.2.1.-);Rhamnogalacturonan α-L-rhamnohydrolase (EC 3.2.1.174);α-L-rhamnosidase (EC 3.2.1.40);	GH	Glycoside Hydrolases	33	1.1e-13
gene1059	Chromosome	GH13_2	GH13's subfamily	GH	Glycoside Hydrolases	58	1.1e-67
gene1078	Chromosome	GH179	β-N-acetylhexosaminidase (EC 3.2.1.52);	GH	Glycoside Hydrolases	33	8.3e-27
gene1163	Chromosome	GH37	α,α-trehalase (EC 3.2.1.28);	GH	Glycoside Hydrolases	88	1.2e-173
gene1167	Chromosome	GH74	Oligoxyloglucan reducing-end-specific cellobiohydrolase (EC 3.2.1.150);Xyloglucan-specific endo-β-1,4-glucanase / endo-xyloglucanase (EC 3.2.1.151);Endo-β-1,4-glucanase (EC 3.2.1.4);	GH	Glycoside Hydrolases	39	4.8e-09
gene1369	Chromosome	GH23	Chitinase (EC 3.2.1.14);Lysozyme (EC 3.2.1.17);Peptidoglycan lytic transglycosylase / peptidoglycan lyase (EC 4.2.2.-);	GH	Glycoside Hydrolases	34	4.5e-29
gene1445	Chromosome	GH19_1	GH19's subfamily	GH	Glycoside Hydrolases	67	1.2e-30
gene1738	Chromosome	GH92	α-1,4-mannosidase (EC 3.2.1.-);Mannosyl-1-phosphodiester α-1,P-mannosidase (EC 3.2.1.-);Mannosyl-oligosaccharide α-1,3-mannosidase (EC 3.2.1.-);Mannosyl-oligosaccharide α-1,2-mannosidase (EC 3.2.1.113);α-mannosidase (EC 3.2.1.24);	GH	Glycoside Hydrolases	65	9.2e-157
gene1743	Chromosome	GH2	α-L-arabinopyranosidase (EC 3.2.1.-);β-1,3-galactosidase (EC 3.2.1.-);β-galacturonidase (EC 3.2.1.-);β-galacturonidase RGII specific (EC 3.2.1.-);Lactase (EC 3.2.1.108);Glycyrrhizin β-glucuronidase (EC 3.2.1.128);β-D-galactofuranosidase (EC 3.2.1.146);Mannosylglycoprotein endo-β-mannosidase (EC 3.2.1.152);Exo-β-1,4-glucosaminidase (EC 3.2.1.165);β-glucosidase (EC 3.2.1.21);β-galactosidase (EC 3.2…	GH	Glycoside Hydrolases	82	7.1e-108
gene1851	Chromosome	GH73	Peptidoglycan endo-β-1,4-N-acetylglucosaminidase (EC 3.2.1.-);Mannosyl-glycoprotein endo-β-N-acetylglucosaminidase (EC 3.2.1.96);	GH	Glycoside Hydrolases	33	2.1e-34
gene1963	Chromosome	GH43_1	GH43's subfamily	GH	Glycoside Hydrolases	38	1e-163
gene1965	Chromosome	GH43_12	GH43's subfamily	GH	Glycoside Hydrolases	52	1e-119
gene1967	Chromosome	GH67	Xylan α-1,2-(4-O-methyl)-glucuronidase (EC 3.2.1.131);α-glucuronidase (EC 3.2.1.139);	GH	Glycoside Hydrolases	94	9.1e-291
gene1998	Chromosome	GH94	Acholetin phosphorylase (EC 2.4.1.-);Glucosylgalactose phosphorylase (EC 2.4.1.-);Mixed-linkage β-glucooligosaccharide phosphorylase (EC 2.4.1.-);Cellobiose phosphorylase (EC 2.4.1.20);Chitobiose phosphorylase (EC 2.4.1.280);Laminaribiose phosphorylase (EC 2.4.1.31);Cellobionic acid phosphorylase (EC 2.4.1.321);β-1,2-oligoglucan phosphorylase (EC 2.4.1.333);Solabiose phosphorylase (EC 2.4.1.389);…	GH	Glycoside Hydrolases	38	0
gene2018	Chromosome	GH43_26	GH43's subfamily	GH	Glycoside Hydrolases	88	2e-102
gene2021	Chromosome	GH5	GH5's subfamily	GH	Glycoside Hydrolases	73	3.9e-121
gene2029	Chromosome	GH93	Exo-α-1,5-L-arabinofuranosidase (EC 3.2.1.-);	GH	Glycoside Hydrolases	80	4.7e-65
gene2106	Chromosome	GH92	α-1,4-mannosidase (EC 3.2.1.-);Mannosyl-1-phosphodiester α-1,P-mannosidase (EC 3.2.1.-);Mannosyl-oligosaccharide α-1,3-mannosidase (EC 3.2.1.-);Mannosyl-oligosaccharide α-1,2-mannosidase (EC 3.2.1.113);α-mannosidase (EC 3.2.1.24);	GH	Glycoside Hydrolases	63	1.3e-187
gene2280	Chromosome	GH23	Chitinase (EC 3.2.1.14);Lysozyme (EC 3.2.1.17);Peptidoglycan lytic transglycosylase / peptidoglycan lyase (EC 4.2.2.-);	GH	Glycoside Hydrolases	45	1.5e-14
gene2335	Chromosome	GH92	α-1,4-mannosidase (EC 3.2.1.-);Mannosyl-1-phosphodiester α-1,P-mannosidase (EC 3.2.1.-);Mannosyl-oligosaccharide α-1,3-mannosidase (EC 3.2.1.-);Mannosyl-oligosaccharide α-1,2-mannosidase (EC 3.2.1.113);α-mannosidase (EC 3.2.1.24);	GH	Glycoside Hydrolases	64	1.8e-164
gene2446	Chromosome	GH144	Exo β-1,2-glucooligosaccharide sophorohydrolase (non-reducing end) (EC 3.2.1.214);Endo-β-1,2-glucanase (EC 3.2.1.71);	GH	Glycoside Hydrolases	80	2.4e-160
gene2583	Chromosome	GH18	Nod factor hydrolase (EC 3.2.1.-);Chitin exo-β-1,4-N-acetylglucosaminidase (EC 3.2.1.-);Di-N-acetylchitobiase / reducing-end exo-hexosaminidase (EC 3.2.1.-);Peptidoglycan endo-β-1,4-N-acetylglucosaminidase (EC 3.2.1.-);Chitosanase (EC 3.2.1.132);Chitinase (EC 3.2.1.14);Chitin exo-β-1,4-N-acetylglucobiosaminidase (EC 3.2.1.200);[reducing end] exo-chitinase (EC 3.2.1.201);β-N-acetylhexosaminidase (…	GH	Glycoside Hydrolases	91	1.4e-78
gene2755	Chromosome	GH3	[retaining] β-NAcetylglucosaminoside phosphorylase (EC 2.4.1.-);β-glycan phosphorylase (EC 2.4.1.-);MLG exo-β-1,4-glucosidase (EC 3.2.1.-);[retaining] xyloglucan-specific exo-β-1,4-glucosidase (EC 3.2.1.-);α-L-arabinopyranosidase (EC 3.2.1.-);Avenacinase (EC 3.2.1.-);β-1,2-glucosidase (EC 3.2.1.-);β-1,6-glucosidase (EC 3.2.1.-);D-4,5-unsaturated β-glucuronyl hydrolase (EC 3.2.1.-);Exo-β-1,3-1,4-g…	GH	Glycoside Hydrolases	67	1.1e-58
gene2936	Chromosome	GH15	Dextran dextrinase (EC 2.4.1.2);[inverting] α-1,6-glucosidase / isomaltase (EC 3.2.1.205);α,α-trehalase (EC 3.2.1.28);[inverting] glucoamylase (EC 3.2.1.3);Glucodextranase (EC 3.2.1.70);	GH	Glycoside Hydrolases	61	1.8e-77
gene3105	Chromosome	GH92	α-1,4-mannosidase (EC 3.2.1.-);Mannosyl-1-phosphodiester α-1,P-mannosidase (EC 3.2.1.-);Mannosyl-oligosaccharide α-1,3-mannosidase (EC 3.2.1.-);Mannosyl-oligosaccharide α-1,2-mannosidase (EC 3.2.1.113);α-mannosidase (EC 3.2.1.24);	GH	Glycoside Hydrolases	48	5.3e-166
gene3151	Chromosome	GH43	GH43's subfamily	GH	Glycoside Hydrolases	86	4.8e-105
gene3199	Chromosome	GH20	β-1,6-N-acetylglucosaminidase (EC 3.2.1.-);β-N-acetyl-6-sulfo-glucosaminidase (EC 3.2.1.-);Lacto-N-biosidase (EC 3.2.1.140);β-N-acetylhexosaminidase (EC 3.2.1.52);Mannosyl-glycoprotein endo-β-N-acetylglucosaminidase (EC 3.2.1.96);	GH	Glycoside Hydrolases	45	2.2e-119
gene3209	Chromosome	GH179	β-N-acetylhexosaminidase (EC 3.2.1.52);	GH	Glycoside Hydrolases	46	1.6e-22
gene3220	Chromosome	GH103	Peptidoglycan lytic transglycosylase / peptidoglycan lyase (EC 4.2.2.-);	GH	Glycoside Hydrolases	81	1.6e-95
gene3588	Chromosome	GH109	α-N-acetylgalactosaminidase (EC 3.2.1.49);β-N-acetylhexosaminidase (EC 3.2.1.52);	GH	Glycoside Hydrolases	91	1.9e-167
gene3779	Chromosome	GH103	Peptidoglycan lytic transglycosylase / peptidoglycan lyase (EC 4.2.2.-);	GH	Glycoside Hydrolases	41	3.6e-110
gene0346	Chromosome	PL6_1	PL6's subfamily	PL	Polysaccharide Lyases	47	1e-170
gene0645	Chromosome	AA4	Vanillyl-alcohol oxidase (EC 1.1.3.38);	AA	Auxiliary Activities	35	3e-24
gene0755	Chromosome	AA6	P-benzoquinone reductase (NADPH) (EC 1.6.5.6);	AA	Auxiliary Activities	97	3.5e-66
gene1073	Chromosome	AA3	Pyranose:oxygen 2-oxidoreductase / glucose 2-oxidase (EC 1.1.3.10);Alcohol oxidase (EC 1.1.3.13);Ecdysone oxidase (EC 1.1.3.16);Glucose 1-oxidase (EC 1.1.3.4);Aryl alcohol oxidase (EC 1.1.3.7);Oligosaccharide dehydrogenase (FAD) (EC 1.1.5.-);Glucose 1-dehydrogenase (FAD, quinone) (EC 1.1.5.9);Cellobiose dehydrogenase (EC 1.1.99.18);Pyranose dehydrogenase (EC 1.1.99.29);	AA	Auxiliary Activities	99	7.3e-53
gene1189	Chromosome	AA2	Peroxidases (EC 1.11.1.-);Ascorbate peroxidase (EC 1.11.1.11);Manganese peroxidase (EC 1.11.1.13);Lignin peroxidase (EC 1.11.1.14);Versatile peroxidase (EC 1.11.1.16);Cytochrome-c peroxidase (EC 1.11.1.5);	AA	Auxiliary Activities	36	1.1e-38
gene1235	Chromosome	AA3	Pyranose:oxygen 2-oxidoreductase / glucose 2-oxidase (EC 1.1.3.10);Alcohol oxidase (EC 1.1.3.13);Ecdysone oxidase (EC 1.1.3.16);Glucose 1-oxidase (EC 1.1.3.4);Aryl alcohol oxidase (EC 1.1.3.7);Oligosaccharide dehydrogenase (FAD) (EC 1.1.5.-);Glucose 1-dehydrogenase (FAD, quinone) (EC 1.1.5.9);Cellobiose dehydrogenase (EC 1.1.99.18);Pyranose dehydrogenase (EC 1.1.99.29);	AA	Auxiliary Activities	46	1.6e-06
gene1752	Chromosome	AA4	Vanillyl-alcohol oxidase (EC 1.1.3.38);	AA	Auxiliary Activities	44	1.3e-23
gene2051	Chromosome	AA3	Pyranose:oxygen 2-oxidoreductase / glucose 2-oxidase (EC 1.1.3.10);Alcohol oxidase (EC 1.1.3.13);Ecdysone oxidase (EC 1.1.3.16);Glucose 1-oxidase (EC 1.1.3.4);Aryl alcohol oxidase (EC 1.1.3.7);Oligosaccharide dehydrogenase (FAD) (EC 1.1.5.-);Glucose 1-dehydrogenase (FAD, quinone) (EC 1.1.5.9);Cellobiose dehydrogenase (EC 1.1.99.18);Pyranose dehydrogenase (EC 1.1.99.29);	AA	Auxiliary Activities	98	3.4e-43
gene2100	Chromosome	AA12	Oxidoreductases (EC 1.-.-.-);	AA	Auxiliary Activities	49	1.4e-28
gene2149	Chromosome	AA7	Chitooligosaccharide oxidase (EC 1.1.3.-);Glucooligosaccharide oxidase (EC 1.1.3.-);Xylooligosaccharide oxidase (EC 1.1.3.-);Cellooligosaccharide dehydrogenase (EC 1.1.99.-);	AA	Auxiliary Activities	79	3e-60
gene2323	Chromosome	AA1	[copper-containing] dihydrogeodin oxidase (EC 1.10.3.-);Laccase / p-diphenol:oxygen oxidoreductase (EC 1.10.3.2);	AA	Auxiliary Activities	74	5.8e-34
gene2485	Chromosome	AA5	Raffinose oxidase (EC 1.1.3.-);Alcohol oxidase (EC 1.1.3.13);5-(hydroxymethyl)furfural oxidase (EC 1.1.3.47);Aryl alcohol oxidase (EC 1.1.3.7);Galactose oxidase (EC 1.1.3.9);Glyoxal oxidase (EC 1.2.3.15);	AA	Auxiliary Activities	51	5.1e-07
gene2649	Chromosome	AA3	Pyranose:oxygen 2-oxidoreductase / glucose 2-oxidase (EC 1.1.3.10);Alcohol oxidase (EC 1.1.3.13);Ecdysone oxidase (EC 1.1.3.16);Glucose 1-oxidase (EC 1.1.3.4);Aryl alcohol oxidase (EC 1.1.3.7);Oligosaccharide dehydrogenase (FAD) (EC 1.1.5.-);Glucose 1-dehydrogenase (FAD, quinone) (EC 1.1.5.9);Cellobiose dehydrogenase (EC 1.1.99.18);Pyranose dehydrogenase (EC 1.1.99.29);	AA	Auxiliary Activities	57	1.7e-07
gene2848	Chromosome	AA3_2	AA3's subfamily	AA	Auxiliary Activities	98	2.6e-161
gene2883	Chromosome	AA1	[copper-containing] dihydrogeodin oxidase (EC 1.10.3.-);Laccase / p-diphenol:oxygen oxidoreductase (EC 1.10.3.2);	AA	Auxiliary Activities	86	1.5e-68
gene3173	Chromosome	AA3_2	AA3's subfamily	AA	Auxiliary Activities	95	4.1e-158
gene3394	Chromosome	AA3	Pyranose:oxygen 2-oxidoreductase / glucose 2-oxidase (EC 1.1.3.10);Alcohol oxidase (EC 1.1.3.13);Ecdysone oxidase (EC 1.1.3.16);Glucose 1-oxidase (EC 1.1.3.4);Aryl alcohol oxidase (EC 1.1.3.7);Oligosaccharide dehydrogenase (FAD) (EC 1.1.5.-);Glucose 1-dehydrogenase (FAD, quinone) (EC 1.1.5.9);Cellobiose dehydrogenase (EC 1.1.99.18);Pyranose dehydrogenase (EC 1.1.99.29);	AA	Auxiliary Activities	60	2.5e-08
gene3481	Chromosome	CBM50	Modules of approx. 50 residues found attached to various enzymes from families GH18, GH19, GH23, GH24, GH25 and GH73, i.e. enzymes cleaving either chitin or peptidoglycan. Binding to chitopentaose demonstrated in the case of Pteris ryukyuensis chitinase A [Ohnuma T et al. (2008) J. Biol. Chem. 283:5178-87 (PMID: 18083709)]. CBM50 modules are also found in a multitude of other enzymes targeting th…	CBM	Carbohydrate-Binding Modules	50	3.1e-12
